# Supplementary material for: The management of hand osteoarthritis: The rheumatologist's perspective
Source: Elsevier journal article supplement (doi:10.1016/j.jht.2022.08.001), 2022-07-01
Supplement: mmc2 [file mmc2.pdf]

## Appendix 2: missing outcomes

Numbers represent amount of patients (% of total study group)

**Table 3.** Missing outcomes for usage characteristics of patients with hand osteoarthritis by category of referral (n=538).

|                                    | Any therapeutic care usage (n=445, 84%) | No therapeutic care usage (n=93, 16%) | Total cohort (n=538, 100%) |
|------------------------------------|-----------------------------------------|---------------------------------------|----------------------------|
| Diagnostic or therapeutic referral | 10 (2%)                                 | 1 (1%)                                | 11 (2%)                    |
| Referring medical professional     | 3 (1%)                                  | 1 (0%)                                | 4 (1%)                     |

Patients were referred to the Rheumatology outpatient clinic of the Leiden University Medical Center and included in the Hand OsteoArthritis Secondary Care (HOSTAS) cohort.

**Table 4.** Missing outcomes for the characteristics of the HOSTAS study population (n=538)

| General patient characteristics             |         |
|---------------------------------------------|---------|
| Age, years                                  | 0 (0%)  |
| Sex, women                                  | 0 (0%)  |
| BMI, kg/m <sup>2</sup>                      | 15 (3%) |
| Living with a partner                       | 0 (0%)  |
| Education, high                             | 6 (1%)  |
| Paid work                                   | 11 (2%) |
| Hand-specific characteristics               |         |
| Fulfilling ACR hand OA criteria             | 0 (0%)  |
| Erosive hand OA                             | 4 (1%)  |
| Symptom duration, years                     | 38 (7%) |
| AUSCAN hand pain                            | 15 (3%) |
| AUSCAN hand function                        | 15 (3%) |
| Tender joint count                          | 0 (0%)  |
| KL summated score                           | 4 (1%)  |
| General burden                              |         |
| Any comorbidity present                     | 0 (0%)  |
| Amount of comorbidities                     | 0 (0%)  |
| Fulfilling ACR hip osteoarthritis criteria  | 12 (2%) |
| Fulfilling ACR knee osteoarthritis criteria | 12 (2%) |

Abbreviations: BMI = Body Mass Index, ACR = American College of Rheumatology, OA = osteoarthritis, AUSCAN = Australian Canadian Osteoarthritis Hand Index, KL = Kellgren Lawrence. HOSTAS = Hand OSTeoArthritis in Secondary care cohort

**Table 5.** Missing outcomes for usage of treatment modalities for joint complaints for patients with hand osteoarthritis in the HOSTAS cohort (n=538)

|                             |         |
|-----------------------------|---------|
| Usage of injections in hand | 10 (2%) |
| In thumb base               | 10 (2%) |
| In fingers                  | 10 (2%) |

Abbreviations: HOSTAS = Hand OSTeoArthritis in Secondary care cohort

**Table 6.** Patient characteristics of the HOSTAS cohort by treatment usage (n=538)

|                        | <b>Any therapeutic care usage (n=445, 84%)</b> | <b>No therapeutic care usage (n=93, 16%)</b> |
|------------------------|------------------------------------------------|----------------------------------------------|
| Age                    | 0 (0%)                                         | 0 (0%)                                       |
| BMI                    | 7 (2%)                                         | 8 (9%)                                       |
| Any comorbidities      | 0 (0%)                                         | 0 (0%)                                       |
| Symptom duration       | 26 (6%)                                        | 12 (14%)                                     |
| Erosive hand OA        | 4 (1%)                                         | 0 (0%)                                       |
| ACR hip and/or knee OA | 0 (0%)                                         | 0 (0%)                                       |
| AUSCAN hand pain       | 15 (3%)                                        | 0 (0%)                                       |
| AUSCAN hand function   | 14 (3%)                                        | 1 (1%)                                       |
| KL summated score      | 3 (1%)                                         | 1 (0%)                                       |

Abbreviations: SD = standard deviation, BMI = Body Mass Index, OA = osteoarthritis, ACR = American College of Rheumatology, HOSTAS = Hand OSTeoArthritis in Secondary care cohort
